# Supplementary material for: Classification of Lu'an Gua Pian tea before and after Qingming Festival using HPLC-DAD analysis: a comparison of different data analysis strategies
Source: Royal Society of Chemistry journal article supplement (doi:10.1039/d5ay00382b), 2025-01-01
Supplement: d5ay00382b1.zip [file d5ay00382b1.zip]

## Sheet: train
train
3.27-2-1	1189	1190	1281	1513	2070	3148	5083	8123	12502	18191	24836	31789	38088	42863	45433	45547	43413	39515	34575	29214	24008	19317	15337	12096	9543	7560	6056	4879	3974	3302	2770	2381	2077	1848	1671	1529	1392	1293	1210	1122	1052	970	941	899	883	862	855	864	872
3.27-2-2	1139	1142	1147	1237	1456	1964	2963	4717	7517	11614	17036	23425	30110	36200	40825	43350	43512	41488	37770	33031	27979	23143	18826	15149	12141	9723	7802	6280	5090	4154	3469	2918	2487	2157	1916	1720	1540	1398	1302	1193	1100	1034	982	918	873	836	826	828	809
3.27-2-3	1141	1144	1210	1416	1893	2877	4639	7516	11770	17462	24293	31636	38611	44234	47697	48532	46834	43106	38045	32394	26790	21676	17273	13691	10848	8636	6908	5573	4578	3788	3186	2717	2360	2081	1866	1697	1560	1447	1341	1238	1139	1077	1035	988	949	942	941	941	948
3.27-3-1	1371	1619	2210	3325	5300	8434	12957	18844	25759	32997	39625	44651	47378	47542	45318	41242	36061	30445	24989	20087	15937	12584	9937	7876	6305	5079	4137	3434	2892	2481	2164	1928	1731	1595	1453	1356	1269	1167	1102	1034	1004	979	940	931	932	947	951	940	929
3.27-3-2	1195	1247	1424	1844	2690	4258	6837	10724	15958	22299	29167	35729	41094	44470	45463	44085	40698	36007	30711	25439	20578	16406	12977	10236	8080	6424	5155	4180	3455	2886	2459	2141	1885	1695	1539	1405	1301	1204	1115	1064	984	939	905	882	866	859	865	871	879
3.27-3-3	1211	1349	1692	2428	3790	6099	9654	14611	20767	27622	34353	40047	43907	45436	44531	41499	37003	31762	26467	21528	17221	13662	10804	8576	6836	5494	4452	3661	3063	2591	2238	1962	1737	1562	1431	1314	1213	1141	1055	1002	922	896	876	867	858	858	862	863	852
3.31-1-1	2243	2131	1973	1808	1646	1503	1371	1283	1215	1175	1165	1192	1306	1614	2329	3735	6205	10119	15760	22969	31296	39814	47310	52603	54962	54230	50799	45409	39013	32411	26242	20848	16412	12897	10181	8089	6469	5233	4295	3562	3001	2584	2240	1993	1792	1612	1469	1348	1270
3.31-1-2	1274	1237	1237	1336	1612	2202	3387	5571	9105	14327	21221	29390	38056	46080	52326	55903	56361	53877	49098	42902	36198	29691	23864	18896	14893	11707	9238	7354	5917	4825	3987	3330	2840	2463	2172	1937	1774	1621	1477	1355	1237	1183	1123	1077	1063	1039	1012	1001	1010
3.31-2-2	1325	1370	1568	1993	2929	4679	7600	12017	18049	25470	33718	41826	48662	53260	55000	53793	50096	44690	38407	32035	26054	20862	16542	13077	10351	8253	6609	5360	4406	3642	3064	2644	2316	2051	1848	1669	1555	1433	1325	1240	1162	1070	1022	988	967	958	945	931	937
3.31-3-2	1306	1257	1237	1278	1425	1789	2596	4100	6707	10730	16355	23470	31622	39832	47013	52085	54366	53707	50487	45385	39209	32788	26716	21411	16972	13401	10612	8434	6773	5469	4456	3693	3116	2665	2313	2057	1859	1679	1522	1390	1303	1223	1143	1079	1037	984	949	939	949
3.31-3-3	1338	1352	1440	1699	2277	3477	5612	9044	14070	20735	28675	37197	45214	51540	55280	56032	53910	49469	43562	37026	30580	24695	19670	15580	12325	9800	7837	6294	5122	4227	3516	2965	2580	2278	2020	1817	1645	1527	1407	1308	1220	1148	1087	1041	1013	992	979	955	948
4.5-1-1	1286	1275	1324	1466	1812	2601	4079	6656	10663	16315	23478	31704	40074	47496	52793	55274	54760	51604	46474	40257	33714	27529	22081	17528	13865	10986	8757	7040	5721	4665	3873	3263	2798	2426	2162	1946	1760	1600	1466	1375	1274	1196	1132	1070	1013	987	992	985	977
4.5-1-2	1167	1189	1270	1522	2083	3218	5248	8510	13261	19594	27160	35249	42752	48615	51998	52524	50375	46112	40445	34210	28109	22622	17984	14212	11209	8882	7084	5683	4610	3786	3159	2684	2323	2041	1829	1661	1516	1389	1273	1184	1098	1025	987	945	918	904	872	863	849
4.5-2-1	1275	1218	1199	1230	1326	1593	2221	3413	5545	8937	13855	20312	27922	35863	43100	48589	51557	51723	49301	44814	39068	32881	26938	21637	17148	13514	10655	8424	6719	5390	4372	3611	3029	2574	2215	1970	1792	1617	1470	1334	1252	1160	1095	1031	976	934	898	889	879
4.5-2-3	1350	1377	1525	1895	2700	4235	6896	11054	16879	24289	32841	41571	49244	54774	57378	56900	53626	48321	41847	35033	28548	22857	18092	14266	11252	8914	7120	5724	4650	3839	3229	2753	2393	2112	1890	1701	1566	1445	1333	1225	1139	1065	1017	989	959	935	922	906	899
4.5-3-1	1165	1185	1322	1622	2312	3615	5825	9321	14298	20649	27925	35331	41889	46654	48987	48690	45997	41509	35989	30184	24686	19823	15758	12464	9850	7821	6246	5044	4131	3413	2869	2453	2136	1888	1701	1557	1419	1301	1197	1116	1048	979	936	901	875	859	844	844	846
4.5-3-2	1203	1205	1231	1366	1690	2412	3799	6162	9873	15169	21993	29823	37816	44903	50105	52679	52446	49602	44802	38867	32646	26754	21539	17161	13627	10819	8628	6926	5615	4591	3793	3178	2714	2357	2069	1852	1677	1519	1387	1285	1183	1107	1046	1000	944	909	883	881	874
4.11-1-1	1093	1140	1298	1714	2572	4192	6980	11403	17719	25860	35419	45264	54075	60590	63957	63821	60502	54732	47522	39874	32606	26192	20860	16564	13192	10559	8509	6918	5659	4681	3917	3334	2870	2531	2257	2037	1832	1677	1543	1426	1322	1222	1168	1119	1071	1026	1001	994	980
4.11-2-1	1046	1081	1207	1564	2327	3821	6436	10671	16822	24897	34537	44754	54171	61420	65497	65968	63061	57469	50226	42347	34720	27915	22206	17578	13932	11111	8897	7171	5831	4779	3960	3338	2849	2476	2206	1976	1774	1608	1469	1351	1237	1146	1075	1015	955	916	894	877	873
4.11-2-2	1072	1182	1476	2109	3376	5653	9413	15036	22581	31834	41937	51660	59604	64621	66106	64086	59165	52331	44590	36889	29853	23837	18927	15046	12009	9647	7824	6386	5246	4357	3663	3128	2732	2406	2145	1933	1768	1614	1476	1351	1251	1183	1122	1060	1014	986	975	963	961
4.11-2-3	1196	1279	1514	2027	3101	5132	8564	13823	21084	30091	40185	50206	58771	64598	66902	65577	61139	54492	46783	38917	31649	25333	20123	15972	12734	10212	8254	6746	5545	4597	3868	3301	2866	2526	2260	2044	1849	1689	1568	1442	1355	1261	1197	1152	1103	1054	1029	1035	1020
4.11-3-1	1268	1291	1412	1757	2510	4012	6654	10896	17125	25437	35369	45943	55843	63630	68225	69108	66436	60928	53534	45366	37368	30169	24005	18972	15009	11891	9465	7590	6133	5014	4171	3517	3024	2630	2327	2105	1921	1765	1605	1470	1353	1284	1206	1169	1115	1090	1052	1024	1009
4.11-3-2	1255	1356	1640	2257	3541	5887	9786	15627	23480	33031	43404	53273	61263	66286	67675	65458	60277	53190	45242	37354	30171	24043	19005	14979	11808	9386	7512	6060	4950	4099	3453	2955	2571	2282	2043	1838	1704	1555	1436	1318	1223	1155	1093	1057	1033	1010	992	960	934
4.11-3-3	1235	1244	1342	1595	2224	3495	5830	9670	15406	23245	32834	43424	53643	62053	67435	69172	67255	62274	55184	47110	38984	31551	25168	19917	15727	12456	9909	7939	6403	5214	4313	3628	3106	2702	2373	2128	1937	1766	1627	1481	1362	1269	1196	1143	1102	1064	1043	1015	994
4.16-1-1	827	829	858	929	1120	1538	2384	3908	6423	10141	15078	21011	27437	33486	38290	41127	41675	40029	36637	32179	27285	22530	18240	14626	11705	9411	7618	6212	5089	4196	3484	2907	2486	2138	1866	1648	1492	1369	1255	1146	1062	996	940	889	861	852	844	839	822
4.16-1-2	971	974	1051	1255	1684	2572	4184	6827	10686	15803	21907	28422	34485	39282	42153	42690	41024	37639	33130	28203	23333	18931	15182	12074	9606	7677	6160	4971	4037	3308	2760	2322	1982	1748	1559	1409	1300	1183	1108	1020	951	900	852	823	787	776	775	765	762
4.21-2-1	781	759	750	738	759	848	1049	1502	2330	3761	6008	9185	13264	17922	22597	26675	29528	30795	30396	28540	25575	22037	18388	14972	11999	9538	7556	5997	4785	3828	3081	2487	2041	1698	1433	1238	1092	975	894	804	730	670	624	576	546	534	529	525	498
4.21-2-2	911	888	906	990	1181	1602	2431	3881	6202	9554	13927	19041	24357	29198	32854	34781	34783	33041	29972	26107	21995	18043	14538	11582	9187	7293	5810	4641	3741	3034	2507	2078	1761	1519	1344	1212	1112	1015	918	854	811	757	708	683	676	678	656	666	688
4.21-3-1	3523	3742	3942	4277	4908	6105	8175	11519	16279	22451	29558	36753	43087	47627	49716	49136	46115	41250	35358	29242	23462	18430	14269	10973	8434	6543	5121	4054	3250	2667	2220	1883	1633	1458	1313	1217	1106	1003	926	865	786	737	708	692	672	659	682	711	729
4.21-3-2	2064	2730	3899	5881	9059	13718	19882	27257	35143	42514	48338	51756	52334	50118	45678	39819	33401	27125	21488	16736	12911	9917	7648	5958	4680	3744	3036	2505	2103	1805	1593	1418	1288	1180	1076	973	893	832	762	717	678	646	652	638	645	683	688	705	713
4.21-3-3	872	848	829	868	995	1286	1908	3071	4987	7923	11963	17011	22656	28198	32838	35898	36997	36108	33561	29870	25590	21260	17271	13813	10973	8707	6930	5545	4435	3588	2913	2400	2012	1710	1478	1302	1175	1072	972	889	824	775	737	698	683	671	675	668	675
4.27-1-3	8410	8460	8681	9348	10895	13859	18806	26162	36039	47874	60423	72024	80994	85964	86331	82307	74687	64789	54023	43579	34262	26427	20175	15367	11735	9064	7100	5655	4597	3818	3251	2818	2492	2225	2022	1851	1702	1553	1444	1335	1239	1168	1092	1050	1013	1012	994	984	980
4.27-2-1	7926	8075	8380	9107	10740	13834	18951	26484	36428	48202	60642	72113	80968	85819	85997	81765	74079	64235	53578	43246	34027	26259	20046	15243	11651	8990	7036	5617	4559	3772	3210	2801	2480	2227	2009	1844	1702	1562	1443	1352	1244	1156	1085	1051	1019	1023	1021	1011	1008
4.27-2-2	7681	7870	8242	9156	11090	14575	20139	28148	38475	50378	62651	73660	81741	85639	84912	79965	71821	61790	51219	41164	32240	24805	18910	14392	11025	8536	6714	5371	4361	3635	3104	2700	2384	2133	1944	1789	1641	1506	1388	1292	1212	1127	1073	1028	1012	993	981	974	976
4.27-2-3	8284	8431	8828	9787	11823	15501	21387	29855	40725	53149	65744	76796	84622	88096	86835	81309	72553	62055	51113	40836	31882	24488	18677	14211	10859	8394	6600	5284	4309	3592	3079	2683	2377	2128	1926	1766	1612	1488	1374	1275	1182	1110	1054	1009	979	976	974	974	980
4.27-3-1	1145	1130	1144	1217	1435	1941	2976	4837	7891	12433	18493	25831	33773	41376	47444	51181	52108	50312	46322	40901	34791	28736	23214	18479	14593	11517	9117	7258	5830	4704	3844	3190	2701	2320	2023	1794	1617	1478	1361	1242	1136	1045	990	945	917	900	877	839	812
4.27-3-3	1178	1232	1435	1922	2933	4729	7671	12077	18012	25161	32968	40502	46681	50588	51769	50243	46474	41223	35256	29246	23706	18912	14971	11823	9366	7465	5996	4830	3940	3259	2749	2347	2056	1825	1643	1498	1384	1266	1165	1080	1012	957	927	899	879	857	839	818	828
5.6-1-1	1924	2433	3247	4689	7094	10815	16185	23135	31216	39525	46983	52457	55213	54906	51771	46461	39908	32994	26439	20677	15898	12110	9194	7002	5369	4171	3269	2625	2123	1751	1494	1289	1123	1001	895	803	726	649	573	503	478	436	417	420	428	453	481	485	490
5.6-1-2	1644	1992	2449	3210	4506	6675	10129	15214	22029	30256	39067	47299	53792	57572	58155	55674	50667	44035	36768	29680	23329	18002	13726	10436	7940	6087	4707	3687	2929	2365	1947	1641	1402	1234	1100	997	882	791	711	617	555	507	461	452	448	451	470	496	514
5.6-1-3	2179	2823	3953	5882	8990	13599	19877	27569	36052	44270	51027	55308	56550	54724	50354	44258	37318	30382	24030	18590	14204	10794	8203	6259	4834	3774	2991	2402	1965	1641	1405	1242	1101	965	870	787	702	606	537	488	446	428	426	426	440	468	474	502	496
5.6-3-1	736	888	1221	1888	3130	5202	8311	12564	17800	23547	29125	33726	36697	37664	36643	33941	30079	25680	21243	17179	13674	10791	8485	6673	5254	4174	3311	2650	2142	1736	1449	1231	1075	946	845	748	656	578	519	475	439	415	382	383	379	377	391	404	404
5.6-3-2	890	923	1012	1254	1756	2705	4329	6807	10243	14543	19333	24041	28045	30762	31865	31259	29191	26077	22452	18726	15282	12269	9759	7740	6162	4903	3944	3194	2605	2167	1824	1567	1362	1203	1086	1000	924	847	791	743	701	674	669	644	646	645	649	664	668
5.10-1-2	817	808	848	936	1162	1618	2531	4074	6451	9753	13899	18556	23187	27139	29821	30917	30389	28457	25527	22085	18533	15189	12228	9751	7741	6133	4871	3893	3125	2541	2098	1744	1492	1297	1131	1000	922	844	784	740	681	629	631	593	579	569	577	592	590
5.10-1-3	975	1009	1085	1279	1723	2598	4157	6631	10153	14676	19853	25143	29825	33219	34903	34692	32803	29653	25816	21775	17901	14432	11489	9074	7132	5617	4451	3544	2860	2318	1914	1621	1396	1225	1104	990	906	849	784	735	682	652	607	587	592	587	609	616	640
5.10-2-1	827	856	949	1184	1665	2615	4229	6717	10166	14451	19220	23916	27887	30616	31713	31132	29088	26012	22422	18754	15307	12283	9761	7721	6100	4828	3849	3094	2531	2087	1758	1501	1305	1141	1027	935	871	812	752	684	645	602	578	576	558	573	578	588	604
5.10-2-3	744	755	782	885	1114	1604	2523	4045	6411	9642	13675	18135	22474	26095	28495	29405	28757	26800	23899	20538	17124	13938	11178	8874	7021	5539	4385	3492	2802	2271	1873	1560	1333	1151	1021	912	830	765	717	657	602	577	531	500	506	492	506	508	525
5.10-3-1	977	1044	1202	1593	2350	3725	5908	9076	13242	18189	23389	28135	31760	33746	33940	32400	29540	25873	21870	17981	14495	11557	9174	7290	5805	4649	3747	3028	2517	2106	1782	1545	1370	1222	1136	1027	954	887	850	799	760	726	703	697	704	711	735	739	734
[truncated: 1,976 more columns]

## Sheet: test
test
3.31-1-3	1455	1677	2199	3273	5284	8585	13507	20142	28172	36913	45340	52281	56686	58004	56284	52021	46082	39356	32617	26420	21035	16593	13047	10287	8157	6542	5295	4354	3628	3064	2630	2320	2087	1876	1702	1550	1451	1335	1252	1173	1105	1053	1013	1006	1002	1002	996	999	988
3.31-2-1	1378	1533	1931	2758	4359	7088	11273	17075	24373	32683	41058	48326	53402	55651	54921	51556	46318	40046	33498	27333	21904	17386	13757	10904	8677	6957	5609	4584	3807	3193	2724	2389	2125	1915	1735	1584	1480	1360	1270	1186	1123	1057	1010	997	987	990	973	955	937
3.31-2-3	1492	1772	2422	3702	5981	9588	14780	21530	29475	37771	45413	51265	54510	54783	52307	47679	41737	35305	29070	23472	18681	14786	11708	9303	7448	6013	4898	4043	3380	2876	2486	2209	1989	1784	1617	1483	1397	1299	1218	1144	1089	1037	1000	980	981	963	968	961	957
3.31-3-1	1319	1326	1445	1737	2379	3647	5845	9431	14613	21369	29262	37469	44905	50546	53607	53740	51141	46441	40487	34083	27929	22457	17846	14065	11088	8772	6991	5627	4584	3771	3168	2708	2346	2071	1876	1711	1557	1427	1324	1244	1164	1096	1046	1003	958	941	949	939	931
4.5-1-3	1252	1269	1334	1511	1971	2897	4638	7537	11915	17927	25375	33624	41712	48470	52916	54531	53261	49541	44090	37774	31377	25465	20336	16086	12709	10067	8021	6438	5195	4259	3545	2976	2555	2243	2016	1803	1626	1481	1382	1272	1175	1106	1053	993	961	940	919	916	905
4.5-2-2	1259	1235	1248	1353	1605	2184	3295	5356	8702	13586	20026	27659	35723	43185	49003	52357	52874	50632	46257	40541	34296	28208	22760	18109	14302	11294	8939	7121	5734	4651	3836	3218	2720	2345	2078	1879	1699	1545	1410	1328	1236	1155	1085	1036	977	944	933	931	913
4.5-3-3	1366	1316	1308	1366	1574	2039	2989	4753	7684	12102	18192	25702	33972	41979	48616	52975	54495	53148	49340	43820	37466	31067	25187	20114	15904	12545	9894	7840	6272	5066	4141	3437	2899	2489	2173	1945	1767	1608	1467	1349	1250	1161	1087	1030	999	958	931	916	907
4.11-1-2	1147	1216	1394	1837	2800	4609	7697	12428	18988	27350	36880	46472	54753	60572	63147	62334	58536	52540	45310	37781	30703	24527	19410	15273	11996	9495	7554	6056	4911	4035	3380	2872	2497	2206	1971	1778	1619	1490	1374	1260	1159	1084	1025	996	984	949	927	895	875
4.11-1-3	1149	1142	1185	1297	1628	2362	3829	6404	10534	16565	24529	33962	43938	53129	60162	64083	64491	61593	56109	49022	41291	33839	27183	21560	17007	13411	10622	8452	6786	5476	4491	3727	3165	2710	2370	2096	1903	1717	1578	1441	1321	1221	1137	1090	1044	1007	979	941	919
4.16-1-3	985	1051	1231	1625	2428	3889	6343	10017	15007	21150	27876	34311	39558	42903	43914	42651	39448	34963	29866	24764	20129	16142	12877	10255	8194	6565	5280	4297	3498	2919	2452	2099	1834	1621	1477	1359	1251	1163	1061	1006	940	886	859	824	811	806	802	809	791
4.21-2-3	4031	4211	4457	4958	5926	7696	10657	14973	20729	27589	34813	41493	46652	49539	49764	47431	43066	37429	31318	25395	20116	15678	12090	9300	7182	5600	4418	3515	2864	2356	1977	1688	1484	1320	1200	1089	977	902	844	772	716	664	642	623	598	612	642	666	676
4.27-1-1	8839	8872	8941	9355	10475	12852	17079	23680	32845	44291	57035	69689	80416	87570	90074	87753	81285	71923	61088	50043	39734	30876	23628	17989	13706	10512	8179	6480	5237	4308	3607	3112	2721	2445	2209	2016	1840	1702	1568	1455	1352	1255	1177	1113	1077	1052	1050	1048	1038
4.27-1-2	7689	7890	8056	8335	9029	10570	13469	18317	25535	35325	47154	59870	71838	81307	86847	87725	84121	76782	66965	56068	45386	35784	27652	21143	16101	12311	9492	7411	5901	4789	3950	3355	2905	2566	2295	2080	1900	1738	1603	1478	1370	1278	1193	1112	1064	1029	1018	987	996
4.27-3-2	1150	1238	1454	1999	3044	4952	8074	12619	18690	25939	33719	41055	46961	50556	51410	49594	45627	40245	34267	28361	22928	18273	14444	11389	8998	7161	5729	4623	3785	3139	2657	2263	1972	1754	1584	1451	1320	1211	1099	1031	975	924	893	856	823	816	793	798	781
5.6-3-3	1110	1163	1351	1787	2650	4213	6786	10587	15624	21641	28058	34071	38823	41659	42190	40542	37147	32664	27727	22873	18499	14743	11687	9238	7321	5839	4689	3802	3106	2584	2188	1883	1647	1480	1337	1229	1131	1038	965	910	860	845	817	803	796	786	796	801	814
5.10-2-2	1136	1123	1134	1183	1319	1643	2295	3511	5553	8625	12774	17817	23281	28557	32866	35580	36381	35301	32653	28980	24829	20683	16884	13589	10879	8709	7006	5682	4670	3898	3298	2836	2495	2249	2063	1917	1814	1726	1665	1612	1574	1545	1505	1493	1480	1478	1492	1514	1560
5.10-3-2	1029	1088	1237	1601	2309	3627	5746	8865	12952	17810	23009	27857	31659	33860	34235	32881	30125	26521	22527	18607	15035	12005	9527	7573	6025	4819	3905	3171	2616	2178	1851	1603	1408	1274	1179	1069	988	931	883	817	783	759	726	718	715	735	753	764	756
5.10-3-3	962	1016	1194	1555	2276	3582	5723	8852	12982	17877	23031	27778	31451	33551	33805	32351	29534	25871	21907	18051	14588	11647	9241	7330	5834	4665	3753	3069	2522	2113	1802	1557	1378	1235	1129	1048	961	896	834	795	746	721	720	700	695	699	721	728	723
[truncated: 1,976 more columns]

## Sheet: pre
pre
3.27-1-1	1204	1184	1187	1267	1517	2066	3148	5099	8272	12984	19263	26751	34681	42084	47929	51417	52142	50170	46009	40483	34369	28371	22923	18252	14421	11372	8995	7145	5715	4633	3825	3189	2699	2335	2039	1817	1648	1494	1374	1287	1188	1107	1019	984	943	912	873	862	883
3.27-1-2	1146	1130	1160	1281	1598	2303	3651	5980	9655	14822	21392	28913	36551	43345	48287	50707	50375	47583	43009	37369	31427	25727	20662	16397	12943	10213	8098	6459	5203	4248	3487	2932	2504	2172	1928	1735	1553	1429	1315	1214	1143	1048	998	954	913	886	876	872	869
3.27-1-3	1371	1337	1360	1486	1810	2540	3965	6450	10361	15920	23096	31405	39919	47583	53333	56327	56287	53460	48525	42313	35698	29325	23620	18781	14817	11695	9269	7384	5927	4833	3974	3321	2826	2446	2149	1924	1735	1584	1465	1357	1264	1159	1095	1046	994	948	923	931	919
4.16-2-1	902	917	950	1053	1323	1877	2951	4826	7793	12084	17556	23832	30260	35959	40083	42094	41796	39390	35409	30613	25612	20917	16793	13378	10615	8443	6741	5426	4391	3577	2962	2476	2125	1839	1636	1457	1322	1226	1135	1039	968	913	844	817	791	784	777	769	763
4.16-2-2	852	841	842	897	1038	1329	1949	3155	5209	8415	12915	18600	25040	31486	37030	40885	42536	41869	39166	35017	30112	25107	20479	16460	13153	10519	8435	6809	5514	4495	3703	3068	2598	2223	1941	1690	1523	1415	1288	1185	1100	1034	974	917	856	847	846	836	840
4.16-2-3	707	709	725	766	905	1203	1838	3039	5084	8230	12602	18107	24345	30597	35944	39616	41128	40402	37719	33690	28922	24088	19606	15738	12574	10057	8074	6543	5321	4351	3591	2980	2508	2150	1858	1612	1447	1339	1222	1123	1034	968	899	846	812	792	778	780	768
4.16-3-1	924	972	1076	1396	2045	3281	5371	8580	13026	18606	24896	31228	36711	40520	42137	41458	38821	34765	29967	25027	20378	16304	12944	10233	8111	6447	5160	4154	3390	2815	2362	2013	1738	1540	1416	1289	1178	1104	1026	949	890	829	789	770	757	740	749	743	755
4.16-3-2	882	987	1209	1721	2712	4454	7174	11070	16093	21858	27738	32936	36721	38564	38360	36220	32685	28337	23760	19426	15622	12453	9888	7850	6256	5006	4044	3281	2708	2269	1919	1663	1474	1315	1208	1100	1017	932	886	822	771	734	711	696	689	696	700	699	676
4.16-3-3	996	1042	1197	1539	2265	3619	5928	9451	14300	20294	26952	33489	38987	42691	44090	43158	40173	35801	30750	25621	20875	16765	13349	10613	8446	6762	5443	4414	3609	3006	2523	2161	1886	1671	1510	1378	1264	1182	1088	1031	964	912	886	859	843	840	848	851	840
4.21-1-1	811	798	786	810	887	1085	1526	2359	3792	6093	9361	13608	18555	23678	28238	31555	33209	33052	31257	28209	24456	20480	16711	13386	10623	8395	6632	5263	4187	3367	2717	2227	1832	1563	1342	1167	1050	962	872	791	727	662	614	586	556	546	525	517	522
4.21-1-2	821	807	799	808	870	1022	1384	2096	3355	5439	8490	12573	17484	22743	27664	31500	33722	34078	32681	29882	26196	22159	18223	14693	11729	9316	7400	5905	4726	3804	3072	2509	2069	1751	1500	1326	1184	1077	964	871	811	758	708	663	630	619	618	597	589
4.21-1-3	800	763	752	735	748	799	957	1295	1980	3189	5199	8147	12090	16803	21814	26536	30245	32390	32725	31353	28636	25069	21185	17404	14005	11127	8782	6925	5475	4345	3473	2793	2262	1854	1555	1320	1153	1031	934	839	748	687	641	593	548	520	501	495	464
5.6-2-1	2357	2952	3910	5636	8486	12847	18964	26757	35661	44704	52710	58440	61065	60317	56553	50559	43313	35752	28628	22398	17205	13129	10033	7709	5994	4732	3793	3116	2586	2199	1907	1698	1517	1389	1281	1201	1098	1008	926	852	805	777	766	762	766	800	827	835	860
5.6-2-2	600	655	836	1217	1940	3273	5446	8674	12952	18056	23465	28504	32459	34770	35146	33705	30771	26934	22746	18639	14970	11845	9304	7287	5711	4479	3535	2814	2244	1816	1493	1242	1056	906	798	705	626	549	492	445	398	369	337	335	334	333	324	340	341
5.6-2-3	581	641	851	1296	2157	3672	6101	9574	14083	19401	24916	29876	33563	35461	35412	33564	30353	26323	22029	17936	14336	11311	8882	6960	5480	4320	3426	2726	2177	1759	1448	1206	1025	887	783	693	617	529	472	431	388	360	335	325	333	322	316	333	338
[truncated: 1,976 more columns]
